# Supplementary material for: Functional characterization of common BCL11B gene desert variants suggests a lymphocyte-mediated association of BCL11B with aortic stiffness
Source: PubMed Central journal article supplement (PMC6189060; doi:10.1038/s41431-018-0226-z), 2018-08-08
Supplement: 41431_2018_226_MOESM1_ESM.pdf [file 41431_2018_226_MOESM1_ESM.pdf]

## Supplementary File

Functional Characterization of Common *BCL11B* Gene Desert Variants suggests an Inflammation-Mediated Association of *BCL11B* with Aortic Stiffness, Al Maskari et al. 2018.

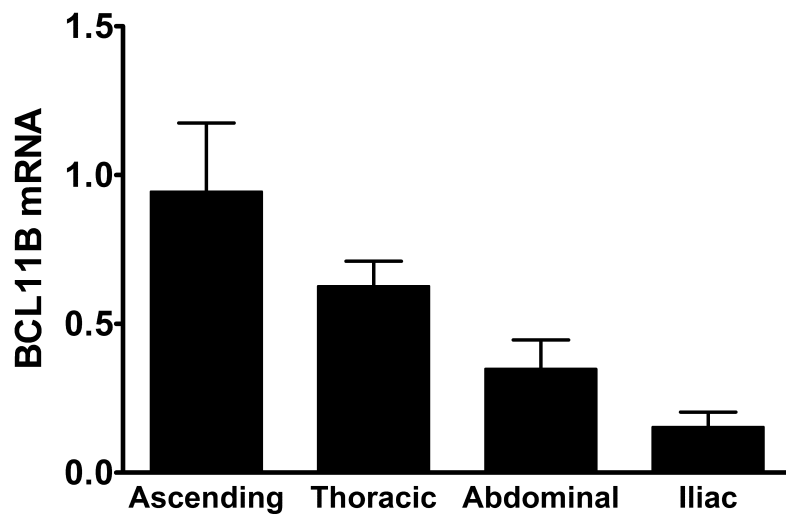

**Supplementary Figure 1. Expression of *BCL11B* mRNA in different segments of the human aorta.** Levels are the  $2^{-\Delta Ct}$  values using GAPDH as house-keeper (mean  $\pm$  SEM).

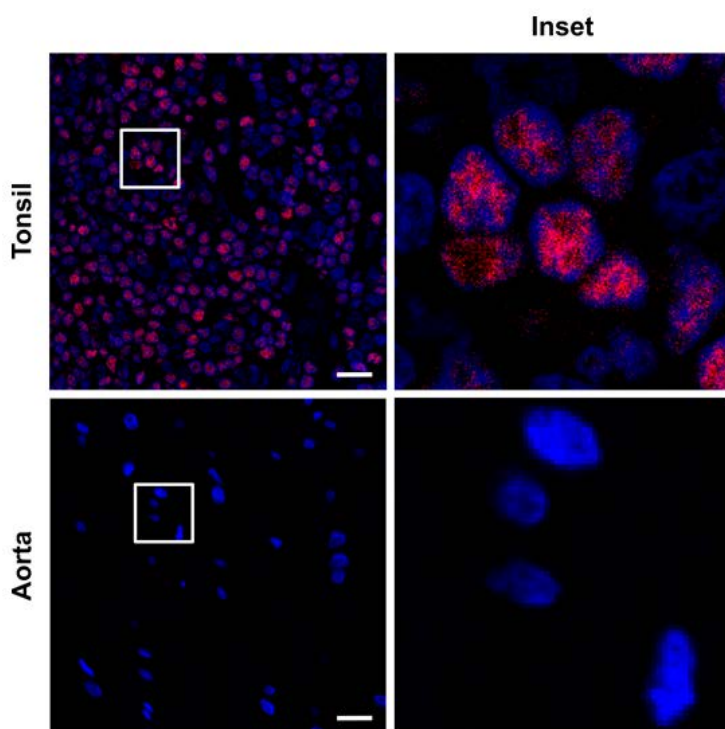

**Supplementary Figure 2. Immunofluorescence staining for *BCL11B* with Tyramide Signal Amplification (TSA) in sections of human tonsil and aorta.** The aortic section is representative of staining in 3 aortas which all showed high *BCL11B* mRNA expression.

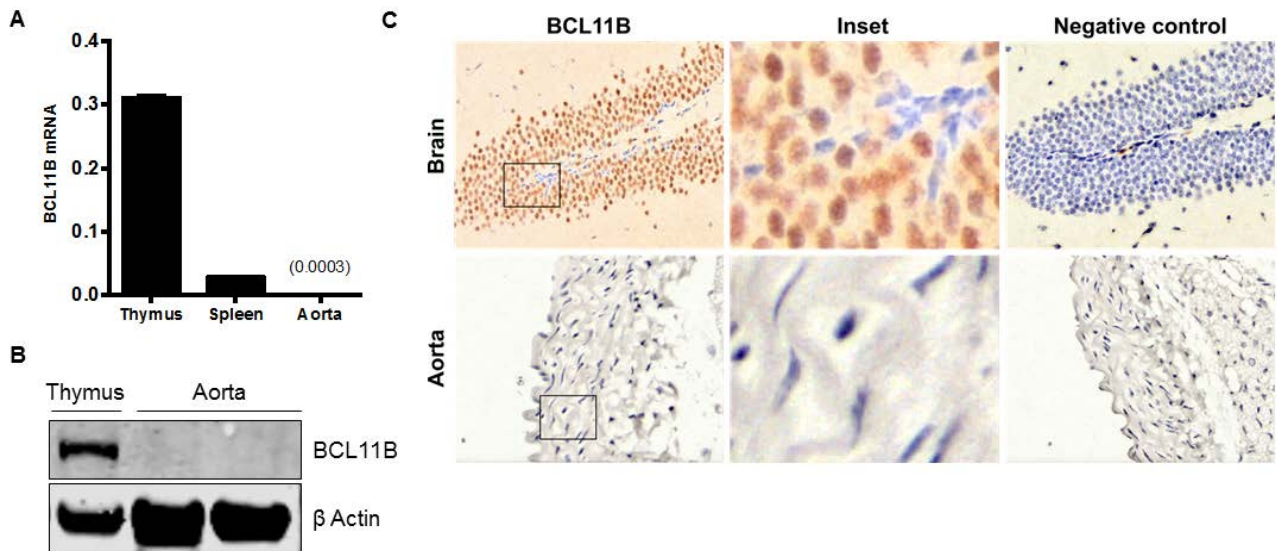

**Supplementary Figure 3. Expression of BCL11B in 10 week-old mice.** **A.** BCL11B mRNA quantified by qPCR (expressed as the 2<sup>-Δt</sup> versus r18S). **B.** Immunoblot of aortic and thymus protein from the same mice. **C.** IHC staining for BCL11B using brain (hippocampus sections) as the positive control. Blots and staining are representative of results from 3 mice.

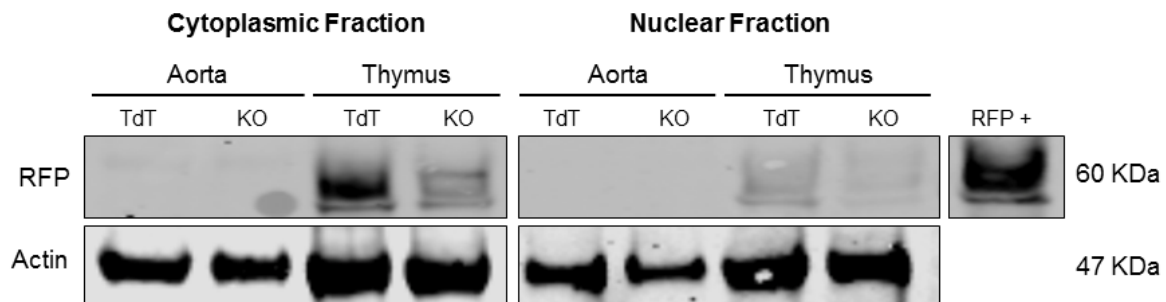

**Supplementary Figure 4. Expression of BCL11B/tdTomato reporter construct in 10 week-old mice.** The aortic and thymus protein extracts were fractionated before immunoblotting to show the relative distribution between the nucleus and cytosol. TdT= BCL11B-tdTomato reporter mice (*Bcl11bTd/flox*)<sup>38</sup>, KO= tdTomato reporter mice treated with tamoxifen (that conditionally knocks out the tdTomato cassette and exon 4 of *Bcl11b*<sup>38</sup>). RFP+ is the positive control of a tdTomato-expressing human colorectal cancer cells.

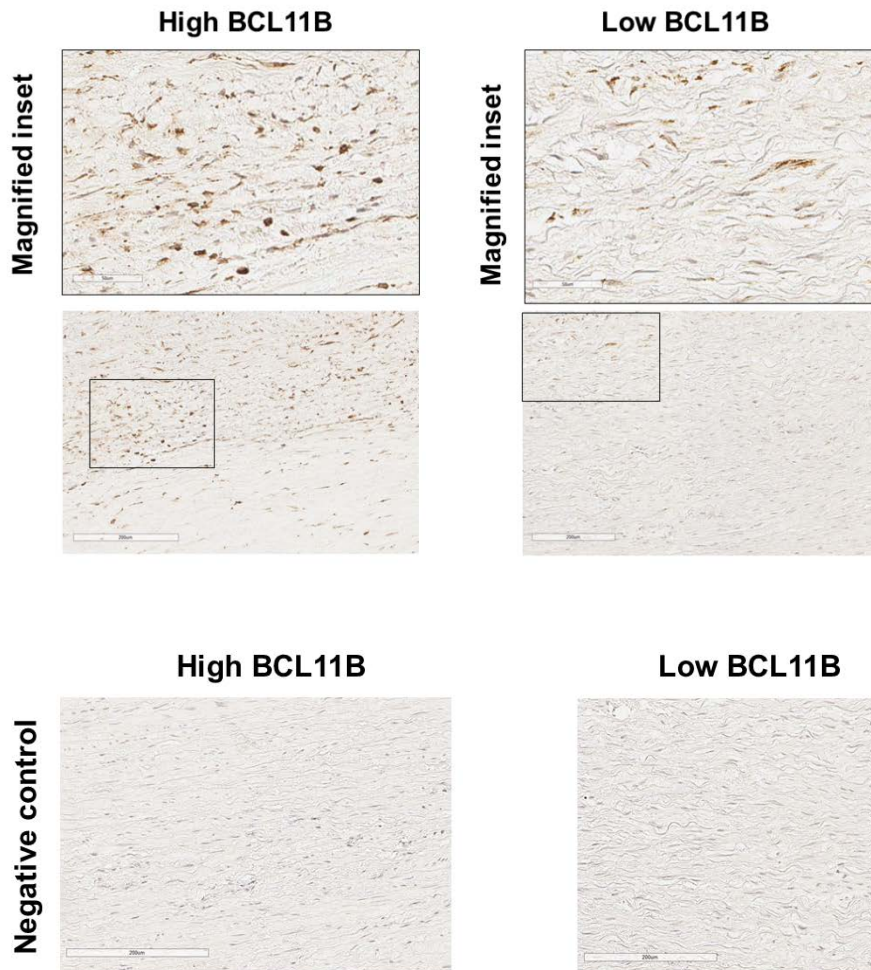

**Supplementary Figure 5. Representative IHC staining for CD45 antigen on human aortic sections expressing either high or low levels of BCL11B mRNA.**

**Supplementary Table. Summarised phenotypic data by SNP genotype data.**

| Parameters               | rs1381289 Genotypes |           |          |         | rs10782490 Genotypes |          |          |         | rs17773233 Genotypes |          |          |         |
|--------------------------|---------------------|-----------|----------|---------|----------------------|----------|----------|---------|----------------------|----------|----------|---------|
|                          | CC                  | CT        | TT       | p-value | CC                   | CT       | TT       | p-value | GG                   | GT       | TT       | p-value |
| Age (years)              | 58±14               | 54 ±16    | 55±15    | 0.333   | 56±15                | 54 ±16   | 58 ±15   | 0.217   | 56±15                | 53 ±17   | 64±10    | 0.124   |
| Male/Female (n)          | 32/27               | 61/41     | 23/17    | -       | 24/24                | 67/39    | 24/22    | -       | 76/57                | 39/23    | 2/6      | -       |
| Height (m)               | 1.69±0.1            | 1.72±0.1  | 1.68±0.1 | 0.170   | 1.68±0.1             | 1.72±0.1 | 1.68±0.1 | 0.018   | 1.70±0.1             | 1.71±0.1 | 1.66±0.1 | 0.401   |
| Weight (kg)              | 79.7±14             | 81.0±17   | 79.7±18  | 0.859   | 79.5±15              | 81.5±17  | 78.1±17  | 0.490   | 79.8±15              | 83.0±19  | 68.4±13  | 0.048   |
| BMI (kg/m <sup>2</sup> ) | 28.5±7.2            | 27.2 ±5.0 | 28.1±5.3 | 0.406   | 28.9±7.4             | 27.3±5.2 | 27.7±5.3 | 0.320   | 27.9±5.9             | 27.9±5.4 | 24.7±4.4 | 0.298   |
| SBP (mmHg)               | 124±28              | 129 ±30   | 119±25   | 0.144   | 125±29               | 127±30   | 122±25   | 0.534   | 126±30               | 126±26   | 119±16   | 0.799   |
| DBP (mmHg)               | 67±13               | 69±14     | 66±14    | 0.539   | 67±13                | 68±14    | 66±14    | 0.729   | 68±14                | 67±14    | 74±13    | 0.339   |
| EM (MPa)                 | 0.16 ±0.1           | 0.17±0.1  | 0.19±0.1 | 0.520   | 0.16±0.1             | 0.17±0.1 | 0.19±0.1 | 0.506   | 0.16±0.1             | 0.18±0.1 | 0.23±0.2 | 0.152   |
| PWV (m/s)                | 3.78±0.8            | 3.90±1.1  | 4.00±1.1 | 0.585   | 3.77±0.8             | 3.87±1.1 | 4.05±1.1 | 0.428   | 3.80±0.9             | 4.05±1.3 | 4.00±0.9 | 0.275   |

Data are mean ± standard deviation.

BMI-body mass index, SBP-systolic blood pressure, DBP-diastolic blood pressure, EM-elastic modulus, PWV-pulse wave velocity.
